# Supplementary material for: Survey on Actual Management of Osteoporosis with the Japanese Medical Data Vision Database in Elderly Patients Undergoing Spinal Fusion
Source: MDPI journal article supplement (doi:10.3390/jcm13102806), 2024-05-10
Supplement: s1 [file s1]

Supplementary Table S1. List of techniques for spinal fusion to be extracted.

| Classification<br>code | Category name                                                                                                                      | Health insurance<br>claim code | Name of health insurance claim code                                                             |
|------------------------|------------------------------------------------------------------------------------------------------------------------------------|--------------------------------|-------------------------------------------------------------------------------------------------|
| K142                   | Spinal fusion, laminectomy, and laminoplasty (surgeries in regions between multiple disc spaces and vertebral arches are included) | 150282510                      | Spinal fusion, laminectomy, and laminoplasty (anterior interbody fusion)                        |
|                        |                                                                                                                                    | 150282610                      | Spinal fusion, laminectomy, and laminoplasty (posterior or posterolateral fusion)               |
|                        |                                                                                                                                    | 150314610                      | Spinal fusion, laminectomy, and laminoplasty (posterior interbody fusion)                       |
|                        |                                                                                                                                    | 150314710                      | Spinal fusion, laminectomy, and laminoplasty (simultaneous anterior/posterior interbody fusion) |

Supplementary Table S2. List of osteoporosis markers to be extracted.

| Classification code | Category name        | Health insurance claim code | Name of health insurance claim code |
|---------------------|----------------------|-----------------------------|-------------------------------------|
| D008                | Endocrinology test   | 160168650                   | BAP                                 |
|                     |                      | 160201750                   | P1NP                                |
|                     |                      | 160164250                   | NTX                                 |
|                     |                      | 160184450                   | TRACP-5b                            |
|                     |                      | 160174850                   | Beta-CTX (urine)                    |
|                     |                      | 160181050                   | Beta-CTX                            |
| D007                | Blood chemistry test | 160215350                   | 25-hydroxyvitamin                   |
|                     |                      | 160209050                   | 25-hydroxyvitamin D                 |

Supplementary Table S3. Osteoporosis medication.

| ATC (EphMRA) | Non-proprietary name       | Dosage form     |
|--------------|----------------------------|-----------------|
| A11C2        | Eldecalcitol               | Oral            |
| M05B3        | Alendronate sodium hydrate | Oral, injection |
|              | Ibandronate sodium hydrate | Oral, injection |
|              | Zoledronic acid hydrate    | Injection       |
|              | Minodronic acid hydrate    | Oral            |
|              | Sodium risedronate hydrate | Oral            |
| G03J0        | Bazedoxifene acetate       | Oral            |
|              | Raloxifene hydrochloride   | Oral            |
| H04E0        | Abaloparatide acetate      | Injection       |
|              | Teriparatide acetate       | Injection       |
|              | Teriparatide (recombinant) | Injection       |
| M05B9        | Romosozumab (recombinant)  | Injection       |
|              | Denosumab (recombinant)    | Injection       |

Supplementary Table S4. List of nutritional management, musculoskeletal rehabilitation, and psychotherapy to be extracted.

|                                | Classification code | Category name                                                        | Health insurance claim code | Name of health insurance claim code                                                                                                          |
|--------------------------------|---------------------|----------------------------------------------------------------------|-----------------------------|----------------------------------------------------------------------------------------------------------------------------------------------|
| Nutritional management         | A104                | Basic daily fee for hospitalization at special functioning hospitals | 190240210                   | Fee to be added for nutritional management system during hospital admission (basic fee for hospitalization at special functioning hospitals) |
|                                | A108                | Basic daily fee for hospitalization at clinics with beds             | 190170770                   | Fee to be added for nutritional management (basic fee for hospitalization at clinics with beds)                                              |
|                                | A109                | Basic daily fee for long-term care beds at clinics with beds         | 190171770                   | Fee to be added for nutritional management (basic fee for long-term care beds at clinics with beds)                                          |
|                                | A233                | Daily fee to be added for nutritional management                     | 190120410                   | Fee to be added for nutritional management                                                                                                   |
|                                | A233-2              | Weekly fee to be added for the nutritional support team              | 190136810                   | Fee to be added for the nutritional support team                                                                                             |
|                                |                     |                                                                      | 190147110                   | Fee to be added for the nutritional support team (specific area)                                                                             |
|                                |                     |                                                                      | 190191770                   | Fee to be added for cooperation with dentist                                                                                                 |
|                                | K000                | Wound treatment                                                      | 150425190                   | Fee to be added for peri-operative nutritional management                                                                                    |
|                                | A100                | Basic daily fee for hospitalization in the general hospital ward     | 190182590                   | Specified fee to be subtracted for the nutritional management system (basic fee for hospitalization)                                         |
|                                |                     |                                                                      | 190182690                   | Specified fee to be subtracted for the nutritional management system (specific fee for hospitalization)                                      |
| Musculoskeletal rehabilitation | H002                | Fee for musculoskeletal rehabilitation                               | 180023610                   | Occupational therapy (1) (individualized therapy)                                                                                            |

---

|           |                                                                                                   |
|-----------|---------------------------------------------------------------------------------------------------|
| 180023710 | Occupational therapy (1) (group therapy)                                                          |
| 180032710 | Fee for musculoskeletal rehabilitation (1)                                                        |
| 180044130 | Fee for musculoskeletal rehabilitation (2) (nursing care required) Not conformed to the standard  |
| 180044230 | Fee for musculoskeletal rehabilitation (3) (nursing care required) Not conformed to the standard  |
| 180052730 | Fee for musculoskeletal rehabilitation (1)*                                                       |
| 180052830 | Fee for musculoskeletal rehabilitation (2)*                                                       |
| 180052930 | Fee for musculoskeletal rehabilitation (3)*                                                       |
| 180053030 | Fee for musculoskeletal rehabilitation (1) (nursing care required / inpatient)*                   |
| 180053130 | Fee for musculoskeletal rehabilitation (1) (nursing care required / outpatient)*                  |
| 180053230 | Fee for musculoskeletal rehabilitation (2) (nursing care required / inpatient)*                   |
| 180053330 | Fee for musculoskeletal rehabilitation (2) (nursing care required / outpatient)*                  |
| 180053430 | Fee for musculoskeletal rehabilitation (3) (nursing care required / inpatient)*                   |
| 180053530 | Fee for musculoskeletal rehabilitation (3) (nursing care required / outpatient)*                  |
| 180053630 | Fee for musculoskeletal rehabilitation (1) (nursing care required) Not conformed to the standard* |
| 180053730 | Fee for musculoskeletal rehabilitation (2) (nursing care                                          |

---

---

|           |                                                                                                                       |
|-----------|-----------------------------------------------------------------------------------------------------------------------|
|           | required) Not conformed to the standard*                                                                              |
| 180023810 | Occupational therapy (2) (individualized therapy)                                                                     |
| 180023910 | Occupational therapy (2) (group therapy)                                                                              |
| 180027810 | Fee for musculoskeletal rehabilitation (2)                                                                            |
| 180053830 | Fee for musculoskeletal rehabilitation (3) (nursing care required) Not conformed to the standard*                     |
| 180024070 | Fee to be added for early rehabilitation during occupational therapy (A)                                              |
| 180024170 | Fee to be added for early rehabilitation during occupational therapy (B)                                              |
| 180024270 | Fee to be added for early rehabilitation during occupational therapy (C)                                              |
| 180024370 | Fee to be added for early rehabilitation during occupational therapy (A) (patients aged less than 15 years)           |
| 180024470 | Fee to be added for early rehabilitation during occupational therapy (B) (patients aged less than 15 years)           |
| 180024570 | Fee to be added for early rehabilitation during occupational therapy (C) (patients aged less than 15 years)           |
| 180024670 | Fee to be added for early rehabilitation during occupational therapy (e.g., early ambulation and independence in ADL) |
| 180027910 | Fee for musculoskeletal rehabilitation (3)                                                                            |
| 180029510 | Fee for musculoskeletal rehabilitation (1) (more than 120 days)                                                       |
| 180029610 | Fee for musculoskeletal rehabilitation (2) (more than 120                                                             |

---

|               |      |                                                                 |           |                                                                                                                                                          |
|---------------|------|-----------------------------------------------------------------|-----------|----------------------------------------------------------------------------------------------------------------------------------------------------------|
|               |      |                                                                 |           | days)                                                                                                                                                    |
|               |      |                                                                 | 180034510 | Fee for musculoskeletal rehabilitation (1) (nursing care required / outpatient)                                                                          |
|               |      |                                                                 | 180045810 | Fee for musculoskeletal rehabilitation (1) (nursing care required / inpatient)                                                                           |
|               |      |                                                                 | 180034610 | Fee for musculoskeletal rehabilitation (2) (nursing care required / outpatient)                                                                          |
|               |      |                                                                 | 180045910 | Fee for musculoskeletal rehabilitation (2) (nursing care required / inpatient)                                                                           |
|               |      |                                                                 | 180034710 | Fee for musculoskeletal rehabilitation (3) (nursing care required / outpatient)                                                                          |
|               |      |                                                                 | 180046010 | Fee for musculoskeletal rehabilitation (3) (nursing care required / inpatient)                                                                           |
|               |      |                                                                 | 180043370 | Fee to be subtracted for non-conformity to facility standards (expense for musculoskeletal rehabilitation; ninety hundredth)                             |
|               |      |                                                                 | 180044030 | Fee for musculoskeletal rehabilitation (1) (nursing care required) Not conformed to the standard                                                         |
| Psychotherapy | I002 | Psychotherapy per consultation on an outpatient basis / at home | 180067230 | Psychotherapy on an outpatient basis (at least 60 minutes on the first consultation day / fee reduction depending on the requirement; other than Item 1) |
|               |      |                                                                 | 180067530 | Psychotherapy on an outpatient basis (less than 30 minutes / fee reduction depending on the requirement; other than Item 1)                              |

|        |                                                                                                                 |           |                                                                                                                                                                                   |
|--------|-----------------------------------------------------------------------------------------------------------------|-----------|-----------------------------------------------------------------------------------------------------------------------------------------------------------------------------------|
| I002-2 | Daily support / instruction fee for continuous treatment at the Department of Psychiatry on an outpatient basis | 180067630 | Psychotherapy on an outpatient basis (at least 30 minutes / fee reduction depending on the requirement; other than Item 1)                                                        |
|        |                                                                                                                 | 180071530 | Psychotherapy on an outpatient basis (at least 60 minutes on the first consultation day / fee reduction depending on the requirement; designated psychiatrist)                    |
|        |                                                                                                                 | 180071630 | Psychotherapy on an outpatient basis (at least 30 minutes / fee reduction depending on the requirement; designated psychiatrist)                                                  |
|        |                                                                                                                 | 180071730 | Psychotherapy on an outpatient basis (less than 30 minutes / fee reduction depending on the requirement; designated psychiatrist)                                                 |
|        |                                                                                                                 | 180031410 | Support / instruction fee for continuous treatment at the Department of Psychiatry on an outpatient basis                                                                         |
|        |                                                                                                                 | 180031570 | Fee to be added to support environmental improvement for medical treatment                                                                                                        |
|        |                                                                                                                 | 180035770 | Fee to be subtracted in case of three or more drugs prescribed (antianxiety or hypnotic)                                                                                          |
|        |                                                                                                                 | 180035870 | Fee to be added for evaluation of adverse reactions by specific drugs (support / instruction fee for continuous treatment at the Department of Psychiatry on an outpatient basis) |
|        |                                                                                                                 | 180050230 | Support / instruction fee for continuous treatment at the                                                                                                                         |



---

|        |                                                                                            |           |                                                                                                                  |
|--------|--------------------------------------------------------------------------------------------|-----------|------------------------------------------------------------------------------------------------------------------|
|        |                                                                                            |           | Department of Psychiatry on an outpatient basis (fee reduction depending on the requirement; Note 2 is excluded) |
| I002-3 | Support fee for continuous treatment at the Department of Psychiatry in emergency patients | 180047610 | Support fee for continuous treatment at the Department of Psychiatry in emergency patients (inpatients)          |
|        |                                                                                            | 180047710 | Support fee for continuous treatment at the Department of Psychiatry in emergency patients (outpatients)         |

---

\*Health insurance claim code when the fee was reduced due to not fulfilling a certain condition specified by the regulatory agency in patients undergoing musculoskeletal rehabilitation.

Supplementary Table S5. Numbers of Executions of Nutritional Management, Musculoskeletal Rehabilitation, and Psychotherapy by Fusion Area Before and After Surgery.

|                                | 2018        |              | 2019        |              | 2020        |              | 2021        |              | 2022        |              |
|--------------------------------|-------------|--------------|-------------|--------------|-------------|--------------|-------------|--------------|-------------|--------------|
| Pre-/post-surgery              | Pre-surgery | Post-surgery |
| Nutritional management         |             |              |             |              |             |              |             |              |             |              |
| Total                          | 6,257       | 6,330        | 6,589       | 6,675        | 6,708       | 6,797        | 7,035       | 7,157        | 26,589      | 26,959       |
| One-level                      | 3,197       | 3,206        | 3,307       | 3,331        | 3,334       | 3,351        | 3,596       | 3,632        | 13,434      | 13,520       |
| Two-level                      | 1,463       | 1,471        | 1,467       | 1,478        | 1,400       | 1,414        | 1,458       | 1,470        | 5,788       | 5,833        |
| Three-level                    | 557         | 564          | 554         | 570          | 598         | 607          | 561         | 575          | 2,270       | 2,316        |
| Four- or more levels           | 1,040       | 1,089        | 1,261       | 1,296        | 1,376       | 1,425        | 1,420       | 1,480        | 5,097       | 5,290        |
| Musculoskeletal rehabilitation |             |              |             |              |             |              |             |              |             |              |
| Total                          | 3,041       | 5,304        | 3,251       | 5,638        | 3,572       | 5,692        | 3,645       | 6,034        | 13,509      | 22,668       |
| One-level                      | 1,558       | 2,702        | 1,579       | 2,850        | 1,761       | 2,860        | 1,842       | 3,101        | 6,740       | 11,513       |
| Two-level                      | 695         | 1,247        | 764         | 1,291        | 777         | 1,221        | 773         | 1,272        | 3,009       | 5,031        |
| Three-level                    | 263         | 481          | 270         | 463          | 305         | 476          | 276         | 469          | 1,114       | 1,889        |
| Four- or more levels           | 525         | 874          | 638         | 1,034        | 729         | 1,135        | 754         | 1,192        | 2,646       | 4,235        |
| Psychotherapy                  |             |              |             |              |             |              |             |              |             |              |
| Total                          | 125         | 276          | 139         | 328          | 132         | 323          | 144         | 530          | 540         | 1,457        |
| One-level                      | 43          | 87           | 48          | 109          | 48          | 123          | 51          | 224          | 190         | 543          |
| Two-level                      | 25          | 66           | 35          | 71           | 28          | 61           | 36          | 99           | 124         | 297          |
| Three-level                    | 19          | 28           | 10          | 33           | 9           | 29           | 13          | 51           | 51          | 141          |

---

|                      |    |    |    |     |    |     |    |     |     |     |
|----------------------|----|----|----|-----|----|-----|----|-----|-----|-----|
| Four- or more levels | 38 | 95 | 46 | 115 | 47 | 110 | 44 | 156 | 175 | 476 |
|----------------------|----|----|----|-----|----|-----|----|-----|-----|-----|

---
